# Supplementary material for: The ENA1 Na+-ATPase Gene Is Regulated by the SPS Sensing Pathway and the Stp1/Stp2 Transcription Factors
Source: MDPI journal article supplement (doi:10.3390/ijms24065548), 2023-03-14
Supplement: s1 [file s1]

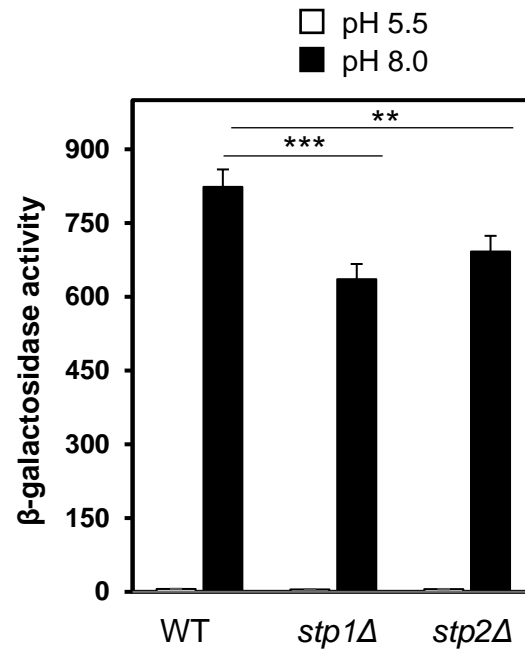

Figure S1. Effect of individual mutations in the *STP1* and *STP2* genes on the expression driven by the full *ENA1* promoter. Plasmid pKC201, bearing the entire *ENA1* promoter, was introduced into strain BY4741 (WT) and its isogenic *stp1* and *stp2* derivatives. Cells were exposed to alkaline pH for 1 h and processed for LacZ activity determination. Data are mean  $\pm$  SEM from 3 independent experiments. \*\*,  $p < 0.01$ ; \*\*\*,  $p < 0.005$ .

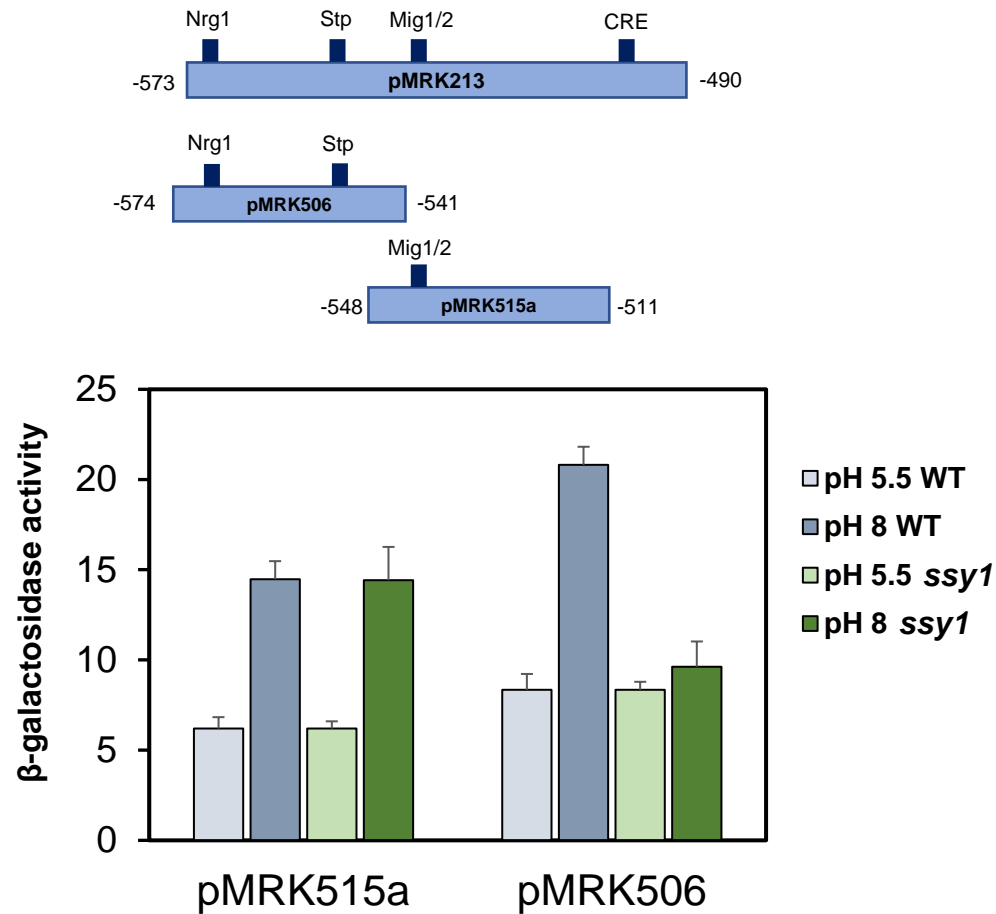

Figure S2.- Functional mapping of the alkaline pH response of the *ENA1* promoter region contained in plasmid pMRK213 in wild type and *ssy1* strains. Cells (23344c background) were transformed with pSLFΔ-178K derived reporters containing the two shorter fragments depicted at the top of the figure and cells were exposed for 1 h to alkaline pH prior determination of  $\beta$ -galactosidase activity. The relevant regulatory sites included in each fragment are depicted. Data are mean  $\pm$  SEM from 4 independent experiments.

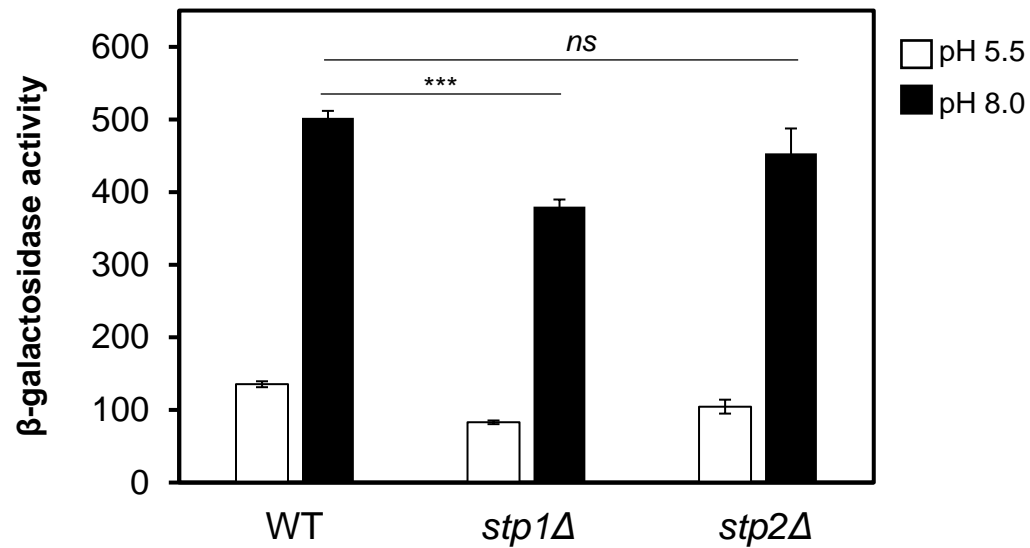

Figure S3.- Effect of the independent *stp1* and *stp2* mutations on the expression from the *HXT2* promoter in the BY4741 background. Cells were grown and processed for  $\beta$ -galactosidase activity determination as in Figure 8. Data are the mean  $\pm$  SEM from 6 independent cultures. *ns*,  $p > 0.05$ ; \*\*\*,  $p < 0.005$ .
