# Supplementary material for: The ENA1 Na+-ATPase Gene Is Regulated by the SPS Sensing Pathway and the Stp1/Stp2 Transcription Factors
Source: Int J Mol Sci. 2023 Mar 14;24(6):5548. doi: 10.3390/ijms24065548 (PMC10055992; doi:10.3390/ijms24065548)
Supplement: Supplementary file 1 [file ijms-24-05548-s001.zip › Table S1 (Oligos).xlsx]

## Sheet: Hoja1
Tale S1. Oligonucleotides used in this work
Name	Sequence	Use
GFP-term Fw	GGCGAATTGGGTACCGGCC	Amplification of yeGFP plus CYC1 terminator, includes KpnI site
GFP-term Rev	CGACCTCGAGATAATGTCTAAAGGTGAAG	Amplification of yeGFP plus CYC1 terminator, includes XhoI site
CYC1promoter5'	ATGAATCGATGTCGAGCAGATCCGCC	Amplification of the CYC1 basal promoter from pAMS366
CYC1promoter3'	GATCGCTCGAGTATTAATTTAGTGTGTGTATTTGTGTTTGCG	Amplification of the CYC1 basal promoter from pAMS366
4x-CDRE 5'	CAGTTATTACCCTCGAGC	Amplification of the CYC1 basal promoter plus 4x CDRE sequences from pAMS366
5'-MIG1/2	CAGAAGCTTAAACATCGCCGTGCGGCGTCATTTTGCGGGGCTCATCATT	Construction of the Mig1/2 binding site of the ENA1 gene
3'-MIG1/2	GACGAATTCATAGAAGTAGGAAATAAATGATGAGCCCCGCAAAATGAC	Construction of the Mig1/2 binding site of the ENA1 gene
5'-Nrg1	CAGAAGCTTCTGCACGAAGTGGTTACATTGTGAGTACAGGGTCTTA	Construction of the Nrg1 binding site of the ENA1 gene
3'_Nrg1	GAGAATTCACGGCGATGTTTAAGACCCTGTACTCACAATGTAACCAC	Construction of the Nrg1 binding site of the ENA1 gene
5' Pho84_Pho4 binding	AGCGGATCCGTTCCACGTGGACGTGTTATTTCCAGCACGTGGGGC	Construction of the Pho4-responsive region of the PHO84 gene
3' Pho84_ pho4 binding	cgGAATTCGCCCCACGTGCTGGAAATAACACGTCCACGTGGAAC	Construction of the Pho4-responsive region of the PHO84 gene
5'-Mig1/2_NOStp2	CAGAAGCTTAAACATCGCCGTGATCGGTCATTTTGCGGGGCTCATCATT	Mutagenesis putative Stp1/2 element in pMIG
NOMig1/2-5’	CAGAAGCTTAAACATCGCCGTGCGGCGTCATTTTGCATCGCTCATCATT	Mutagenesis putative Stp1/2 element in pMIG
NOMig1/2-3’	GACGAATTCATAGAAGTAGGAAATAAATGATGAGCGATGCAAAATGAC	Mutagenesis Mig1/2 element in pMIG
NOMig1/2_NOStp2-5’	CAGAAGCTTAAACATCGCCGTGATCGGTCATTTTGCATCGCTCATCATT	Mutagenesis Mig1/2 element in pMIG
ena1_prom_5'_A	TGCACTGCAGTCATCCGCACGTG	Amplification promoter ENA1 for pMRK805 reporter, added PstI site
ena1_prom_5'_B	TGCACTGCAGATCTTCAATCACAGAG	Amplification promoter ENA1 for pMRK706 reporter, added PstI site
ena1_prom_5'_C	TGCACTGCAGATTACCATGCGCGG	Amplification promoter ENA1 for pMRK605 reporter, added PstI site
ena1_prom_3'_A	CACGCTCGAGACCTGTACTCACA	Amplification promoter ENA1 for pMRK805 and pMRK605 reporters, added XhoI site
ena1_prom_3'_C	CACGCTCGAGCCGCGCATGGTAATCA	Amplification promoter ENA1 for pMRK706 reporter, added XhoI site
ena1_prom_5'_G	TACGCGTCGACGTCATTTTGCGGGGCTCAT	Construction of pMRK515a reporter, added SalI site
ena1_prom_3'_E	CACGCTCGAGAGAAGTAGGAAATAAATGAT	Construction of pMRK515a reporter, added XhoI site
5´-ENA1-509	TCCCCCGGGACAGGGTCTTAAACATCGCCGTGCGGCGTCATTTCTCGAGCGGCG	Construction of pMRK506 reporter, added SmaI site
3´-ENA1-509	CGCCGCTCGAGAAATGACGCCGCACGGCGATGTTTAAGACCCTGTCCCGGGGGA	Construction of pMRK506 reporter, added XhoI site
